# Supplementary material
Source: PubMed Central journal article supplement (PMC5912467)
Supplement: supp_RA117.000269_132900_1_supp_71574_p3sqnf.pdf [file supp_RA117.000269_132900_1_supp_71574_p3sqnf.pdf]

Supporting information for:

Hypoxanthine is a checkpoint stress metabolite in colonic epithelial energy modulation and barrier function

**J. Scott Lee<sup>1</sup>, Ruth X. Wang<sup>1</sup>, Erica E. Alexeev<sup>1</sup>, Jordi M. Lanis<sup>1</sup>, Kayla D. Battista<sup>1</sup>, Louise E. Glover<sup>2</sup>, and Sean P. Colgan<sup>1\*</sup>**

From the <sup>1</sup>Department of Medicine and the Mucosal Inflammation Program, University of Colorado School of Medicine, Aurora, CO USA; <sup>2</sup>School of Medicine, University College Dublin, Ireland

**Running title:** *Epithelial adenylate metabolites and barrier function*

**Key words:** Epithelia, barrier function, energy metabolism, actin

\*To whom correspondence should be addressed: Sean Colgan, Mucosal Inflammation Program, University of Colorado, Anschutz Medical Campus, 12700 East 19th Ave. MS B-146, Aurora, CO 80045, USA. Office phone: 303-724-7235 Fax: 303-724-7243  
E-mail: [sean.colgan@ucdenver.edu](mailto:sean.colgan@ucdenver.edu)

---

### Table of Contents

#### Figures

|                                                                                          |     |
|------------------------------------------------------------------------------------------|-----|
| Figure S1. HPLC traces of sub-confluent control and 1 mM allopurinol-treated cells.      | S-2 |
| Figure S2. Barrier and metabolite responses to 2-deoxyglucose + oligomycin A treatments. | S-3 |

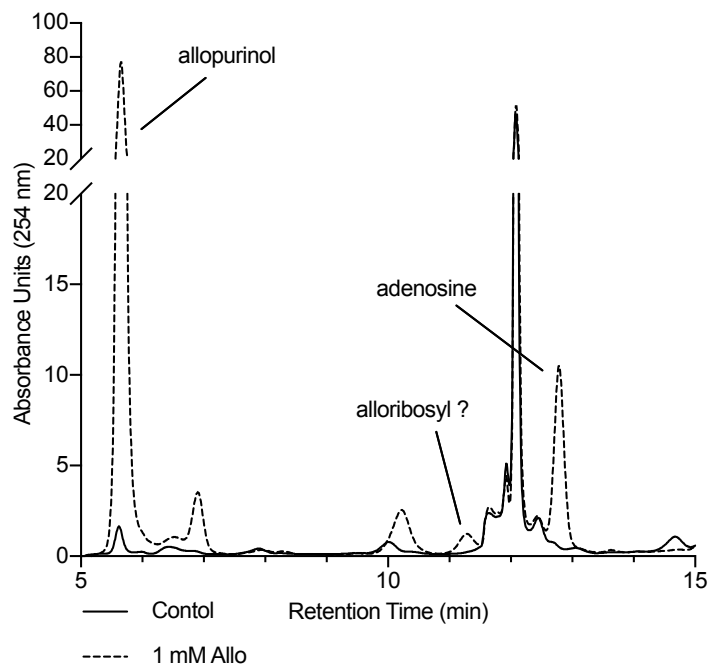

**Figure S1.** HPLC traces of sub-confluent control and 1 mM allopurinol-treated cells. Indicated are retention times for allopurinol, adenosine, and the proposed alloribosyl. For comparison, retention time for inosine is ~8 min.

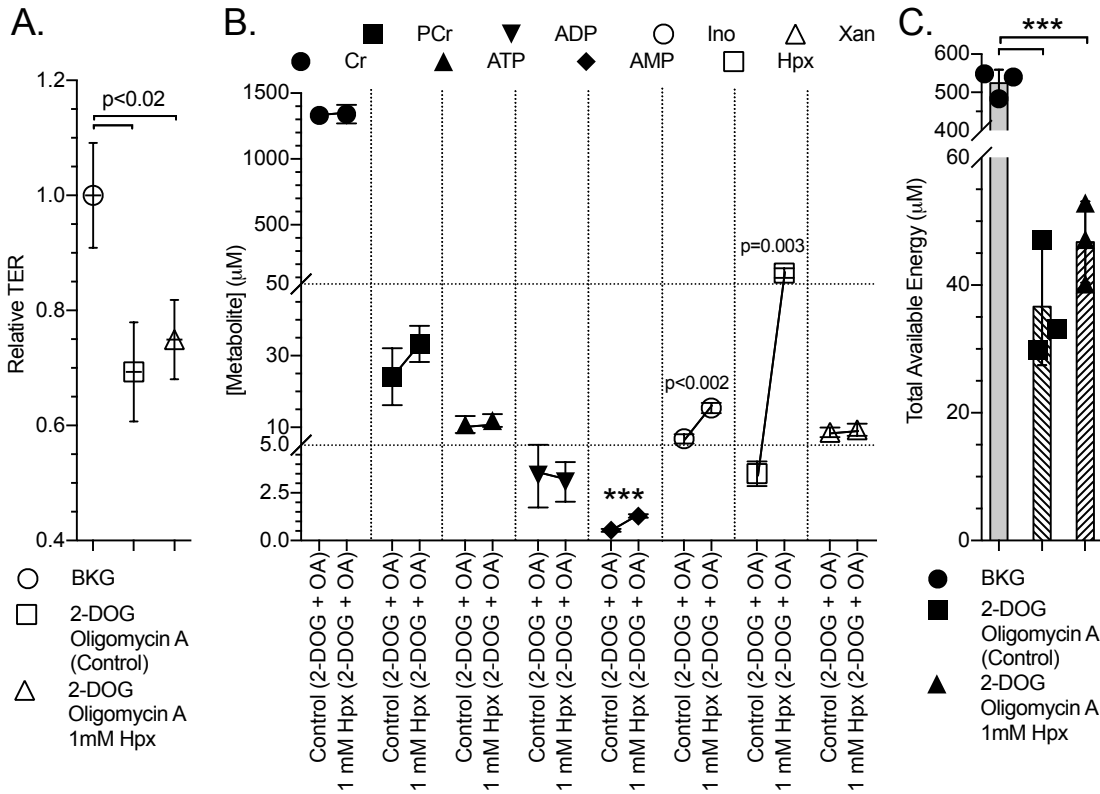

**Figure S2.** Barrier and metabolite responses to 2-deoxyglucose + oligomycin A treatments. (A and B) Barrier and metabolite responses of T84 cells to 2-deoxyglucose (20 mM) + oligomycin A (2  $\mu\text{M}$ ) with and without hypoxanthine (1 mM) as measured by HPLC;  $n = 3$ ,  $t = 30$  min. (C) Total available energy of results depicted in panel B. Data presented as mean  $\pm$  SD; TER, transepithelial resistance; 2-DOG, 2-deoxyglucose; BKG, background (untreated); Total available energy =  $\text{PCr} + \text{ATP} + (0.5 \cdot \text{ADP})$ ; Cr, creatine; PCr, phosphocreatine; ATP, adenosine triphosphate; ADP, adenosine diphosphate; AMP, adenosine monophosphate; Ino, inosine; Hpx, hypoxanthine; Xan, xanthine; \*\*\* indicates  $p < 0.001$ .
